# Supplementary material
Source: PubMed Central journal article supplement (PMC6993880)
Supplement: NIHMS1549154-supplement-Supplemental_Material.pdf [file NIHMS1549154-supplement-Supplemental_Material.pdf]

**SUPPLEMENTAL MATERIAL**

**Carotid plaques with high-risk features in embolic stroke of undetermined source: systematic review and meta-analysis**

Joseph KAMTCHUM-TATUENE, MD, Alan WILMAN, PhD, Maher SAQQUR, MD, Ashfaq SHUAIB, MD, Glen JICKLING, MD

Contents

**Table I: Search strategy**..... 1

**Table II: Risk of bias assessment tool** ..... 2

**Table III: Specific prevalence of the high-risk features reported in the included studies**..... 3

**Figure I: Study selection**..... 4

**Figure II: Pooled prevalence of contralateral carotid plaque with high-risk features in ESUS** 5

**Figure III: Funnel plot for the meta-analysis of prevalence of ipsilateral carotid plaque with high-risk features in ESUS** ..... 6

**Figure IV: Pooled prevalence of ipsilateral carotid plaque with high-risk features in ESUS after excluding studies with sample size < 20 or with potential population overlap**..... 7

**Figure V: Odds-ratio of finding plaque with high-risk features in the ipsilateral versus the contralateral carotid in ESUS after excluding studies with sample size < 20 or with potential population overlap.** ..... 8

**Table I: Search strategy**

| <b>PUBMED</b>      |                                                                 | <b>Number of records</b> |
|--------------------|-----------------------------------------------------------------|--------------------------|
| #1                 | Stroke OR “transient ischemic attack”                           | 325873                   |
| #2                 | plaque OR atherosclerosis                                       | 227905                   |
| #3                 | cryptogenic                                                     | 6548                     |
| #4                 | #1 AND #2                                                       | 14250                    |
| #5                 | #3 AND #4                                                       | 142                      |
| <b>Ovid EMBASE</b> |                                                                 | <b>Number of records</b> |
| #1                 | Stroke.mp. or exp cerebrovascular accident/                     | 464331                   |
| #2                 | transient ischemic attack.mp. or exp transient ischemic attack/ | 37720                    |
| #3                 | #1 OR #2                                                        | 475310                   |
| #4                 | cryptogenic.mp.                                                 | 10600                    |
| #5                 | #3 AND #4                                                       | 3292                     |
| #6                 | exp atherosclerotic plaque/                                     | 31772                    |
| #7                 | #5 AND #6                                                       | 46                       |
| #8                 | limit #7 to (human and English language)                        | 39                       |

**Table II: Risk of bias assessment tool**

| Risk of bias item                                                                                                                                                                                                                                                                                                                                                                                                                                                                                                                                                                                                                                                                                                                                                                                                                                                                                                                                                                        | Response:       |
|------------------------------------------------------------------------------------------------------------------------------------------------------------------------------------------------------------------------------------------------------------------------------------------------------------------------------------------------------------------------------------------------------------------------------------------------------------------------------------------------------------------------------------------------------------------------------------------------------------------------------------------------------------------------------------------------------------------------------------------------------------------------------------------------------------------------------------------------------------------------------------------------------------------------------------------------------------------------------------------|-----------------|
|                                                                                                                                                                                                                                                                                                                                                                                                                                                                                                                                                                                                                                                                                                                                                                                                                                                                                                                                                                                          | Yes = 1, No = 0 |
| <b>External validity</b>                                                                                                                                                                                                                                                                                                                                                                                                                                                                                                                                                                                                                                                                                                                                                                                                                                                                                                                                                                 |                 |
| <ol style="list-style-type: none"> <li>1. Was the study target population a close representation of the national population (adults, children, or both) in relation to relevant variables? (no restriction on sex/race/profession/marital status or other criteria that would limit the diversity of the sample and therefore its representativeness and the generalizability of the result)</li> <li>2. Was the sampling frame a true or close representation of the target population as suggested by the study title and objectives? (e.g. patients presenting with anterior circulation cryptogenic stroke or embolic stroke of undetermined source)</li> <li>3. Was some form of random selection used to select the sample, OR, was a census undertaken? (census or consecutive/exhaustive sampling)</li> <li>4. Was the likelihood of non-participation bias minimal? (probability that investigators have failed to include subjects that would normally be eligible)</li> </ol> |                 |
| <b>Internal Validity</b>                                                                                                                                                                                                                                                                                                                                                                                                                                                                                                                                                                                                                                                                                                                                                                                                                                                                                                                                                                 |                 |
| <ol style="list-style-type: none"> <li>5. Were data collected prospectively directly from the participants (as opposed to mere review of medical records or retrospective data collection)?</li> <li>6. Was the process of identifying patients with cryptogenic stroke appropriate and clearly described?</li> <li>7. Was the diagnostic method (brain imaging) used to identify high-risk carotid plaque clearly described (<u>type of imaging</u>, eventually with sequences and qualification of the reader)?</li> <li>8. Was the same assessment protocol used for all the participants?</li> <li>9. Were the results of the plaque imaging clearly presented? (adequate reporting of data within each category of lesion/patients + discrete categories/no overlapping + no errors requiring a guess/adjustments)</li> <li>10. Were the numerator(s) and denominator(s) for the calculation of the prevalence of high-risk plaque appropriate?</li> </ol>                          |                 |
| <b>Interpretation of the score</b>                                                                                                                                                                                                                                                                                                                                                                                                                                                                                                                                                                                                                                                                                                                                                                                                                                                                                                                                                       |                 |
| 8 – 10: Low Risk of Bias / High-quality study. Further research is very unlikely to change our confidence in the estimate.                                                                                                                                                                                                                                                                                                                                                                                                                                                                                                                                                                                                                                                                                                                                                                                                                                                               |                 |
| 5 – 7: Moderate Risk of Bias / Moderate-quality study. Further research is likely to have an important impact on our confidence in the estimate and may change the estimate.                                                                                                                                                                                                                                                                                                                                                                                                                                                                                                                                                                                                                                                                                                                                                                                                             |                 |
| 4 or less: High Risk of Bias / Low-quality study. Further research is very likely to have an important impact on our confidence in the estimate and is likely to change the estimate. Further research is mandatory.                                                                                                                                                                                                                                                                                                                                                                                                                                                                                                                                                                                                                                                                                                                                                                     |                 |

Adapted from Hoy D, Brooks P, Woolf A, Blyth F, March L, Bain C, et al. Assessing risk of bias in prevalence studies: modification of an existing tool and evidence of interrater agreement. *J Clin Epidemiol.* 2012;65:934-939, Copyright © 2012, with permission from Elsevier.

**Table III: Specific prevalence of the high-risk features reported in the included studies**

| Risk feature                   | Number of studies* | Number of patients | Prevalence (95% CI) ‡ |                    | pooled OR (95% CI) † |
|--------------------------------|--------------------|--------------------|-----------------------|--------------------|----------------------|
|                                |                    |                    | ipsilateral side      | contralateral side |                      |
| <b>intraplaque haemorrhage</b> | 5                  | 162                | 24.4 (17.9 - 31.5)    | 0.6 (0.0 - 3.7)    | 9.4 (2.9 – 30.5)     |
| <b>echolucency</b>             | 1                  | 44                 | 50.0 (35.8 - 64.2)    | 31.8 (20.0 - 46.6) | 2.1 (0.9 - 5.1)      |
| <b>plaque thickness ≥ 3 mm</b> | 1                  | 85                 | 35.3 (26.0 - 45.9)    | 15.3 (9.2 - 24.4)  | 3.0 (1.4 - 6.3)      |
| <b>fibrous cap rupture</b>     | 2                  | 50                 | 23.6 (12.4 - 36.7)    | 0.0 (0.0 - 3.7)    | 17.5 (2.2 – 140.1)   |
| <b>thrombus</b>                | 3                  | 94                 | 6.9 (2.2 - 13.5)      | 0.0 (0.0 - 2.0)    | 5.8 (1.0 – 34.3)     |
| <b>ulceration</b>              | 1                  | 44                 | 0.0 (0.0 - 8.0)       | 0.0 (0.0 - 8.0)    | NA                   |

\*One study only provided aggregated data for the high-risk features considered: Bayer-Karpinska A, Schwarz F, Wollenweber FA, Poppert H, Boeckh-Behrens T, Becker A, et al. The carotid plaque imaging in acute stroke (CAPIAS) study: protocol and initial baseline data. *BMC Neurol.* 2013;13:201.

† The prevalence and odds ratios were pooled using a random effect meta-analysis.

**Figure I: Study selection**

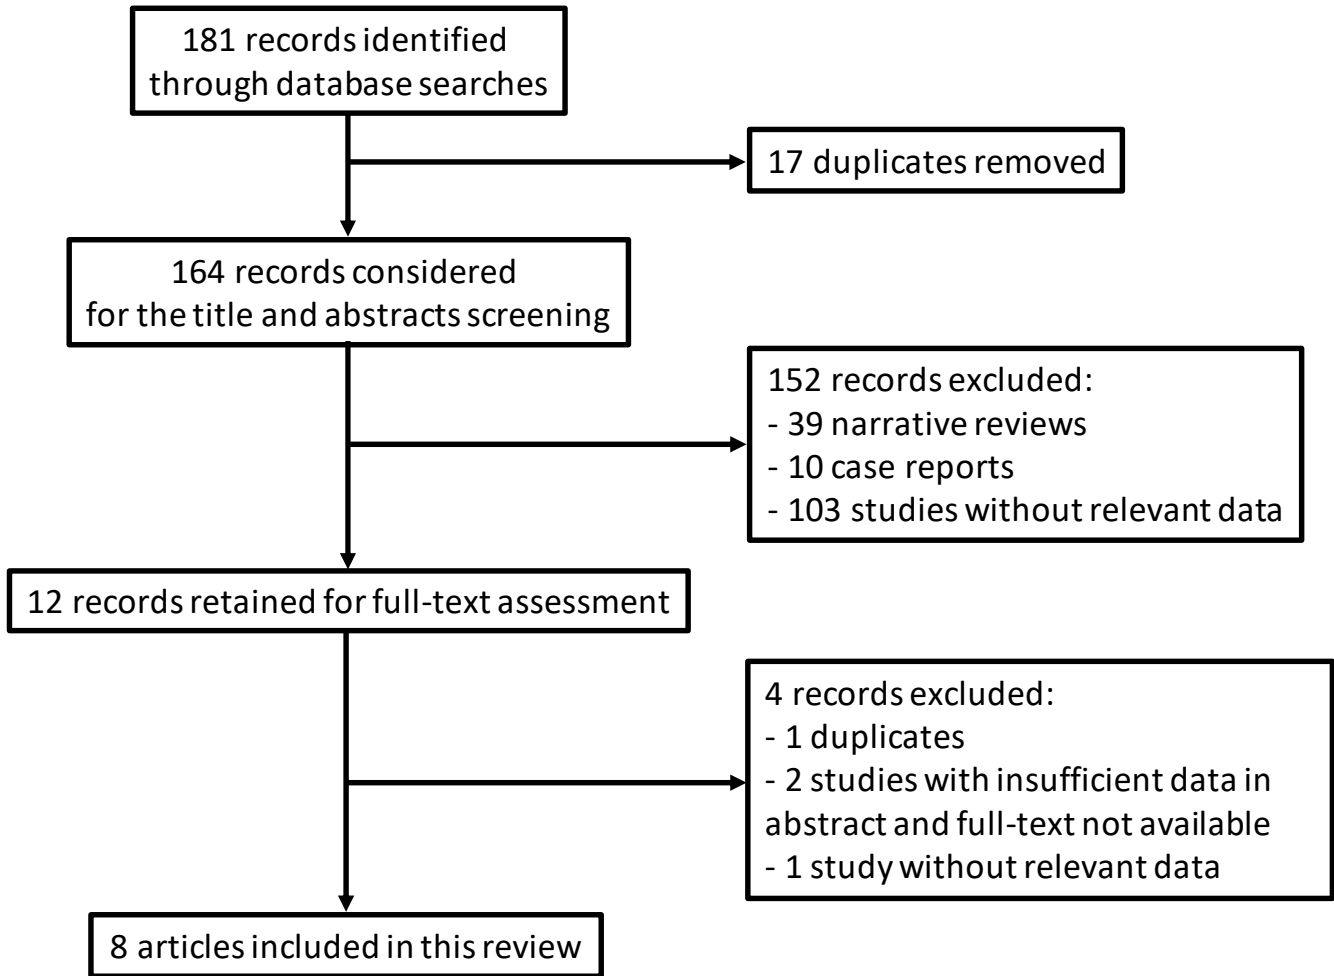

**Figure II: Pooled prevalence of contralateral carotid plaque with high-risk features in ESUS**

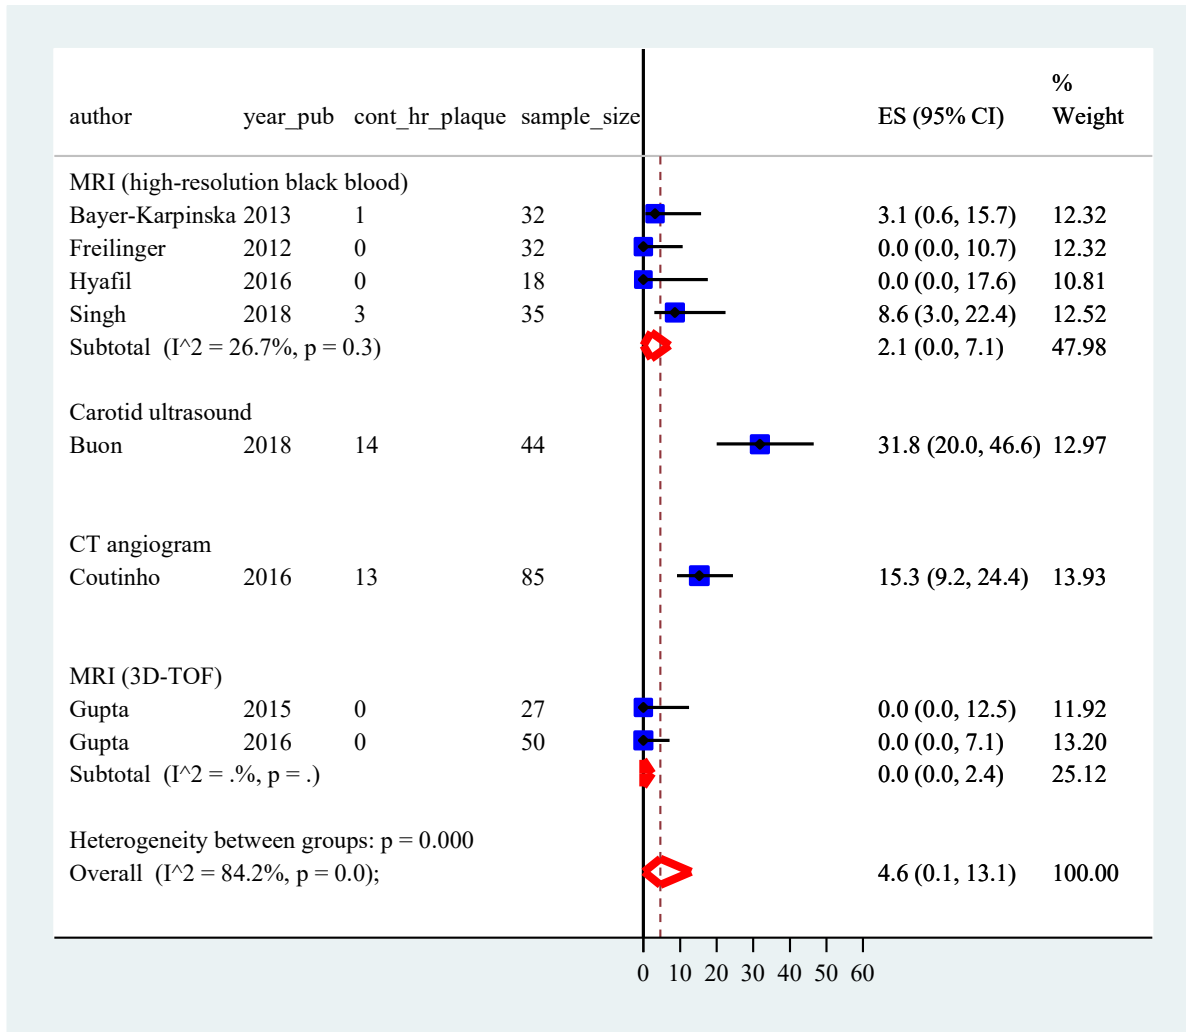

3D-TOF = 3-dimensional time of flight, CI = Confidence interval, CT = Computed tomography, cont\_hr\_plaque = contralateral carotid plaque with high-risk features, ES = Effect size, MRI = Magnetic resonance imaging, sample\_size = number of participants in the study, year\_pub = year of publication

**Figure III: Funnel plot for the meta-analysis of prevalence of ipsilateral carotid plaque with high-risk features in ESUS**

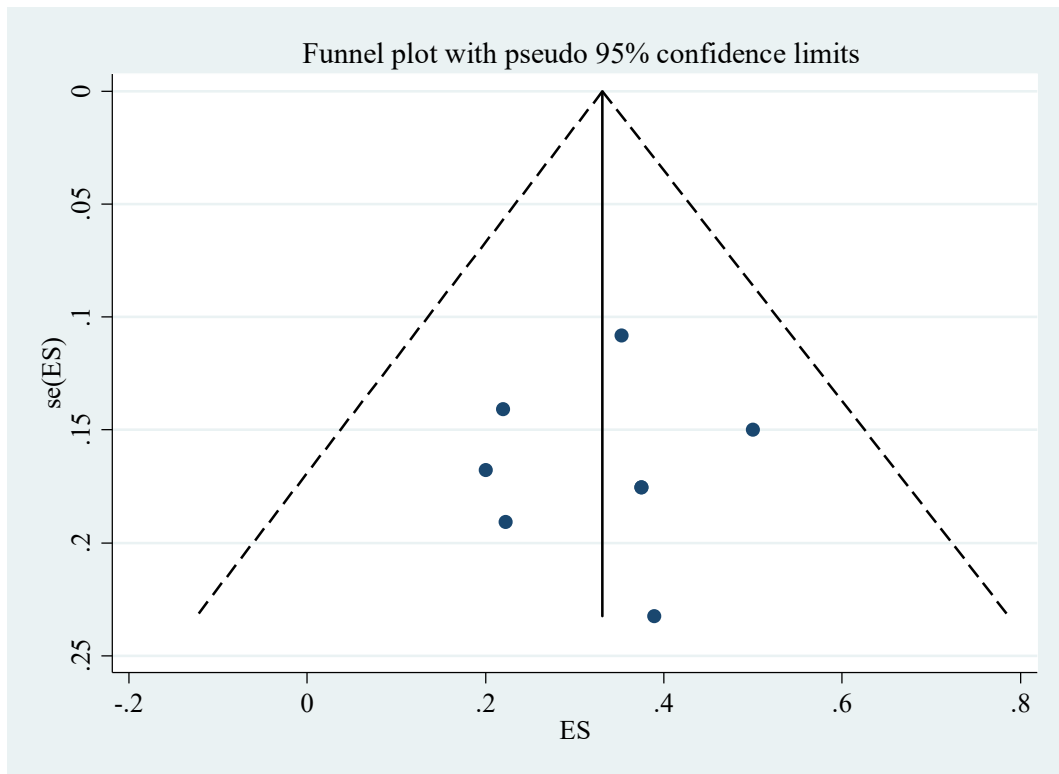

ES = Effect size (prevalence), se (ES) = standard error of effect size

The symmetric distribution of the studies (blue dots) around the average effect size (black vertical line,  $x = 0.325$ ) supports the absence of small-study effect as confirmed by the Egger's test ( $p = 0.876$ ). There are only 7 blue dots (instead of 8) because two studies have the same sample size and the same effect size (see Figure 1).

**Figure IV: Pooled prevalence of ipsilateral carotid plaque with high-risk features in ESUS after excluding studies with sample size < 20 or with potential population overlap.**

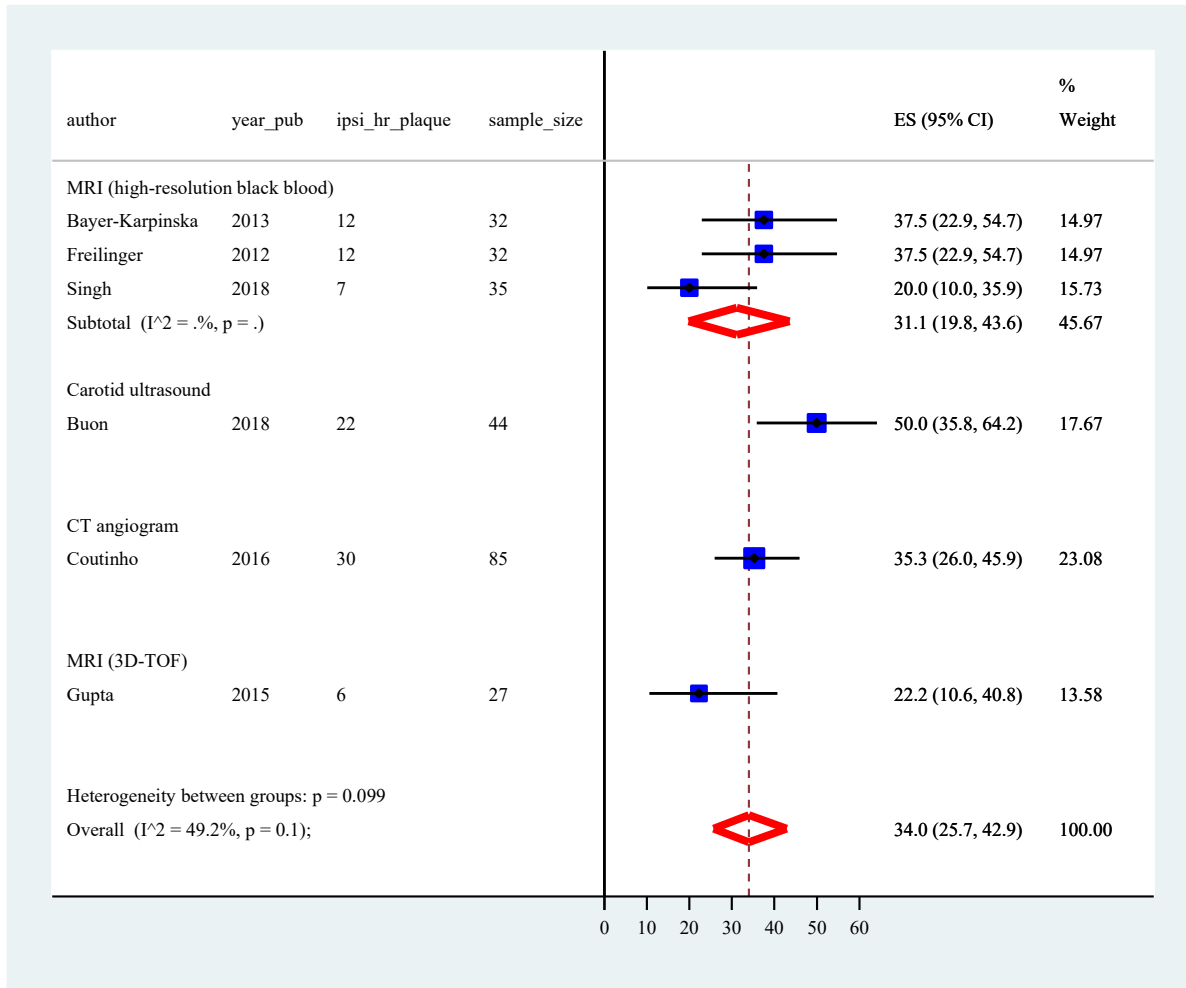

3D-TOF = 3-dimensional time of flight, CI = Confidence interval, CT = Computed tomography, ES = Effect size, ipsi\_hr\_plaque = ipsilateral carotid plaque with high-risk features, MRI = Magnetic resonance imaging, sample\_size = number of participants in the study, year\_pub = year of publication

**Figure V: Odds-ratio of finding plaque with high-risk features in the ipsilateral versus the contralateral carotid in ESUS after excluding studies with sample size < 20 or with potential population overlap.**

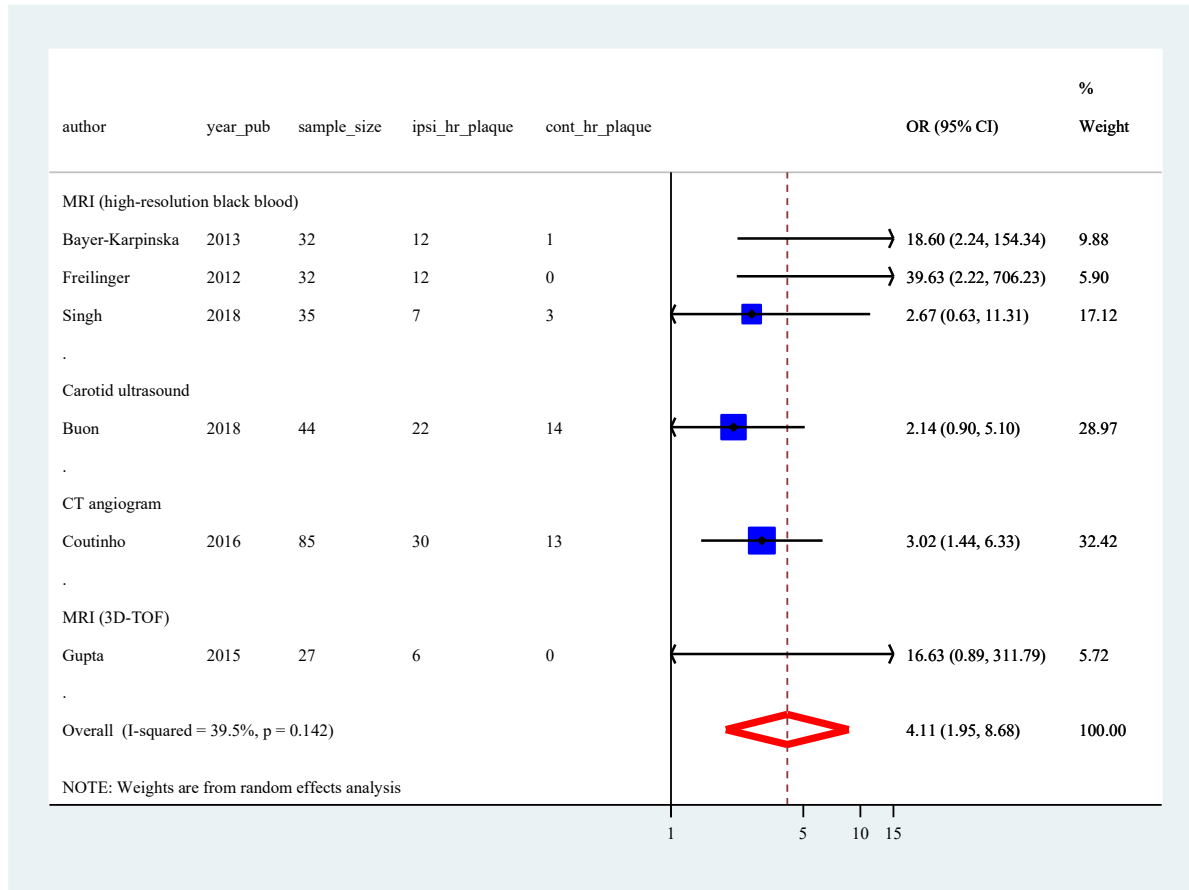

3D-TOF = 3-dimensional time of flight, CI = Confidence interval, CT = Computed tomography, cont\_hr\_plaque = contralateral carotid plaque with high-risk features, ipsi\_hr\_plaque = ipsilateral carotid plaque with high-risk features, MRI = Magnetic resonance imaging, OR = Odds ratio, sample\_size = number of participants in the study, year\_pub = year of publication
